# Supplementary material for: NMR and Rheological Study of Anion Size Influence on the Properties of Two Imidazolium-based Ionic Liquids
Source: PubMed Central journal article supplement (PMC5566215; doi:10.1038/s41598-017-09509-2), 2017-08-21
Supplement: 41598_2017_9509_MOESM1_ESM.pdf [file 41598_2017_9509_MOESM1_ESM.pdf]

## SUPPLEMENTARY INFORMATION

### **NMR and Rheological Study of Anion Size Influence on the Properties of Two Imidazolium-based Ionic Liquids**

Stephen GREEN<sup>1</sup>, Michael E. RIES<sup>1\*</sup>, Jamie MOFFAT<sup>2</sup>, Tatiana BUDTOVA<sup>3\*</sup>

*1 - Soft Matter Physics Research Group, School of Physics and Astronomy, University of  
Leeds, Leeds, LS2 9JT, United Kingdom*

*2 - Innovia Films R&D Centre, West Road, Wigton, Cumbria CA7 9XX, United Kingdom*

*3 - MINES ParisTech, PSL Research University, Centre for Material Forming (CEMEF), UMR CNRS  
7635, CS 10207, 06904 Sophia Antipolis Cedex, France*

The data for this article can be found at <http://doi.org/10.5518/122>.

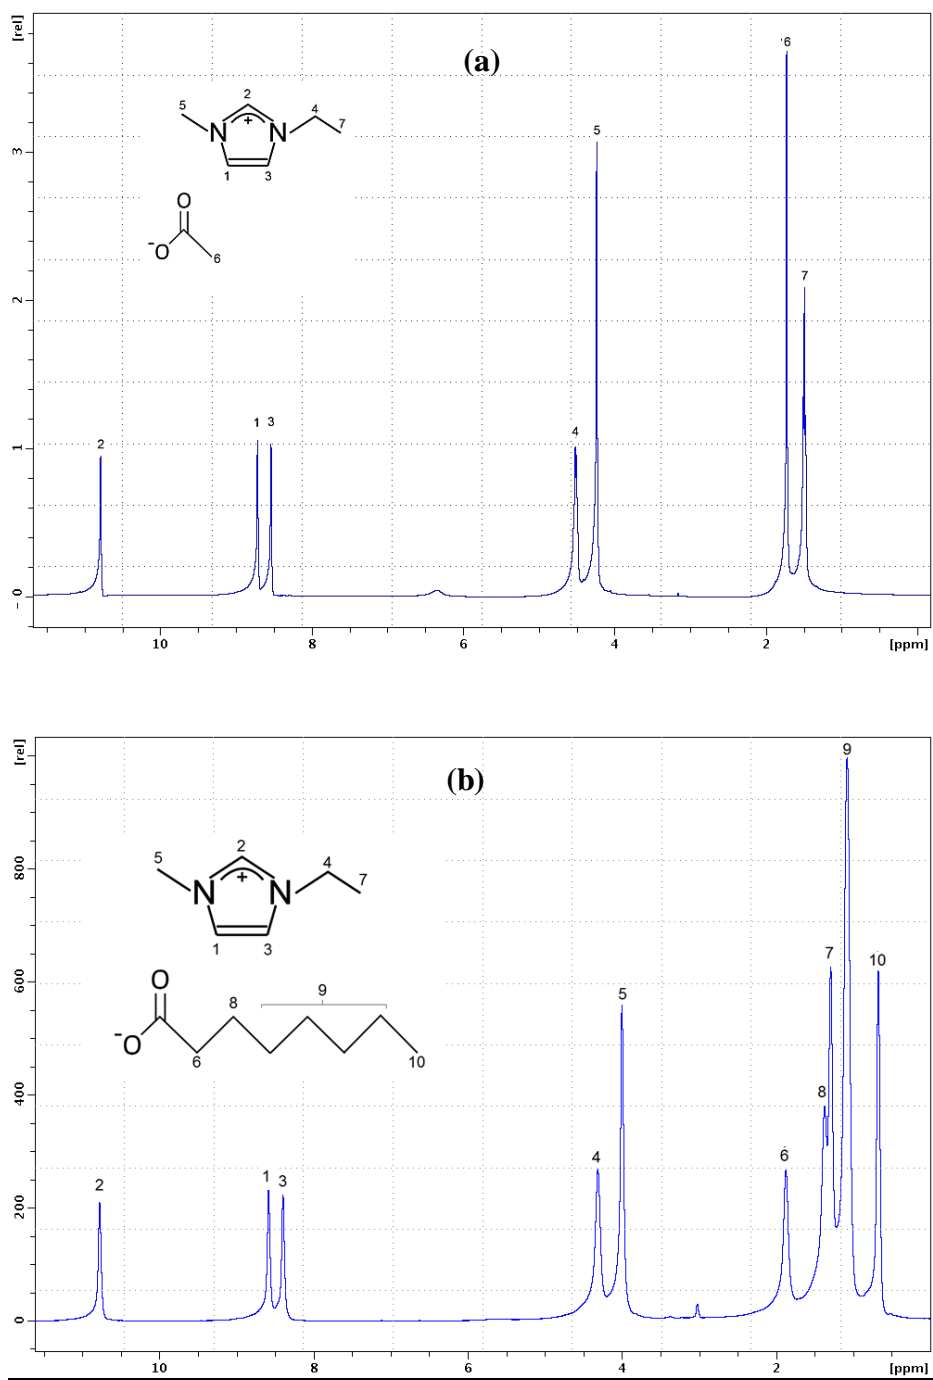

**Figure S1.**

$^1\text{H}$  NMR spectra of  $[\text{C}_2\text{MIM}][\text{OAc}]$  (a) and  $[\text{C}_2\text{MIM}][\text{OOct}]$  (b) at 20 °C. The chemical structure is shown with the inset and peaks are labelled accordingly.

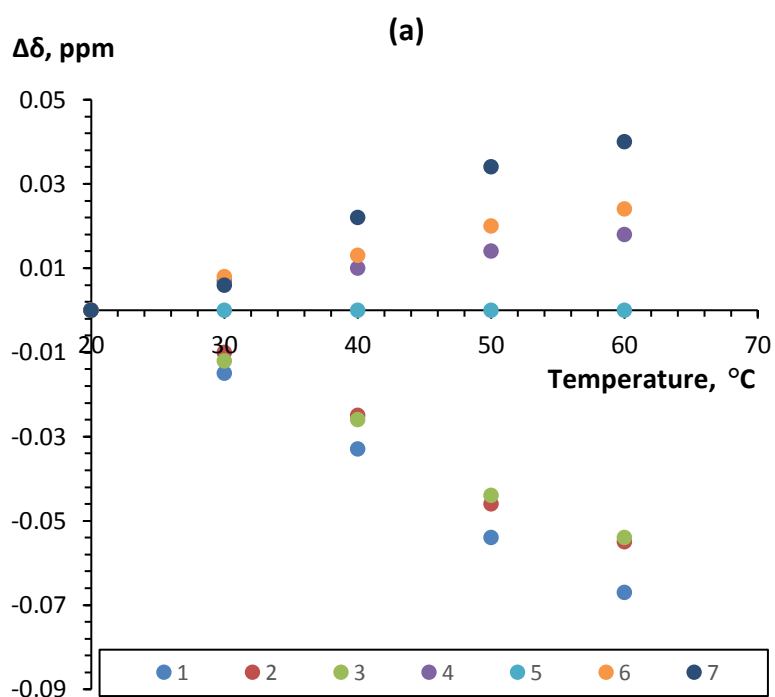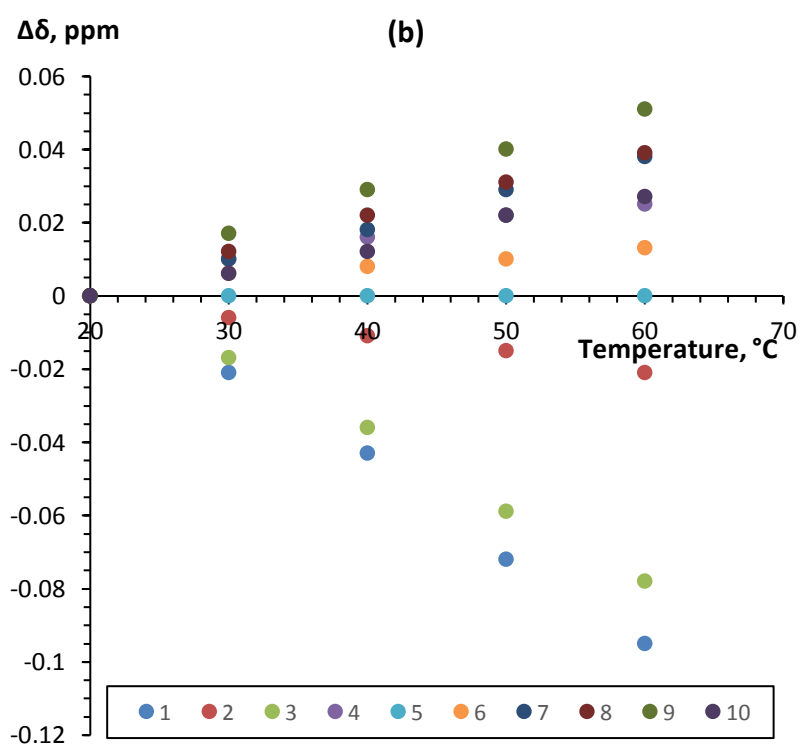

**Figure S2**

Chemical shift as a function of temperature for  $[\text{C}_2\text{MIM}][\text{OAc}]$  (a) and  $[\text{C}_2\text{MIM}][\text{OOct}]$  (b). Resonances are numbered according to Figure 1, see also Figures S1a and S1b, respectively.

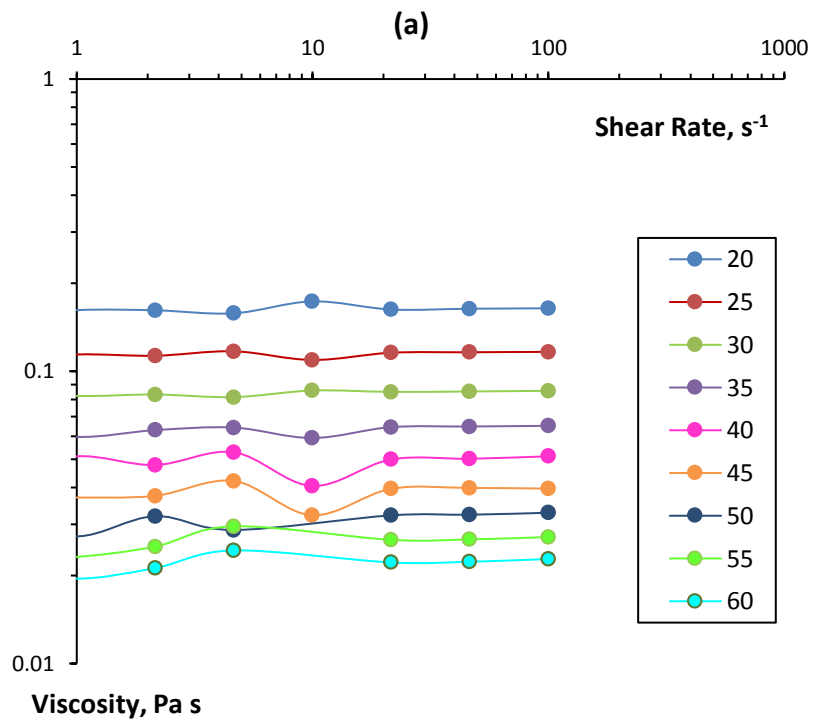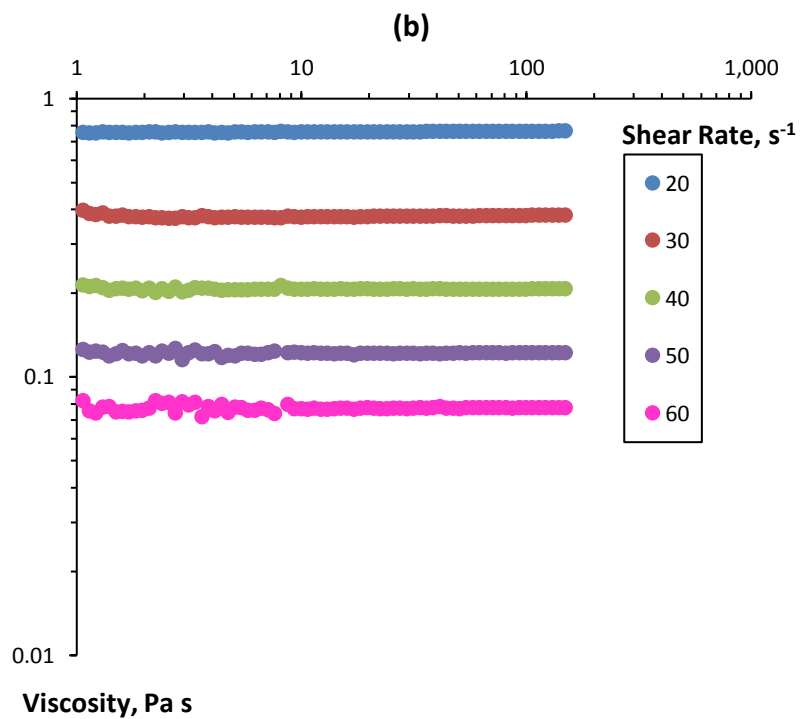

**Figure S3**

Steady-state viscosity as a function of shear rate for  $[C_2MIM][OAc]$  (a) and  $[C_2MIM][OOct]$  (b).

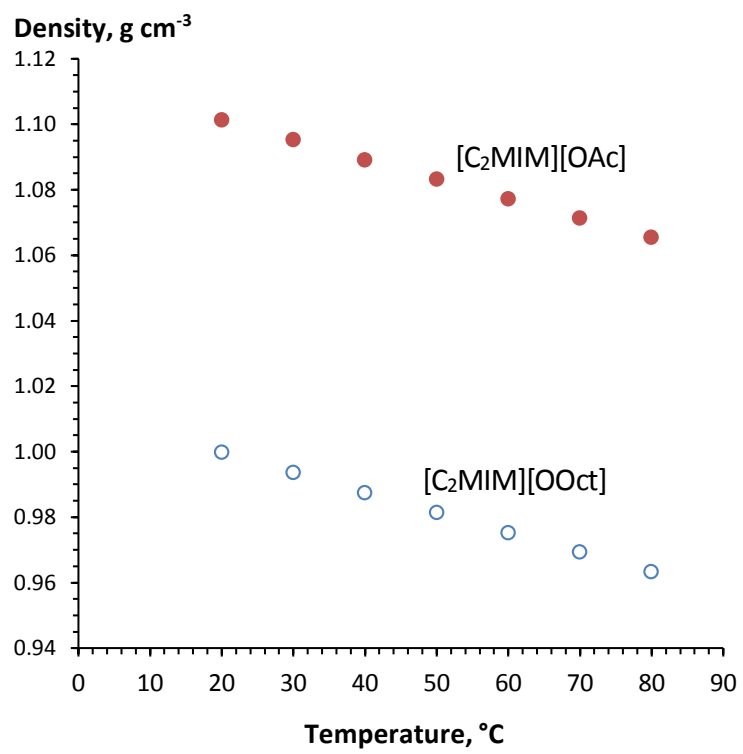

**Figure S4**

Density as a function of temperature for [C<sub>2</sub>MIM][OAc] and [C<sub>2</sub>MIM][OOct].

**Table S1. Fitting parameters for relaxation data, based on BPP theory <sup>1</sup>**

|                            | [C <sub>2</sub> MIM][OAc] | [C <sub>2</sub> MIM][OOct]: $T_1$ | [C <sub>2</sub> MIM][OOct]: $T_2$ |
|----------------------------|---------------------------|-----------------------------------|-----------------------------------|
| $A / \text{s}^{-2}$        | $9.50 \times 10^8$        | $6.69 \times 10^8$                | $6.69 \times 10^8$                |
| $r_{H-H} / \text{Å}$       | 2.12                      | 2.25                              | 2.25                              |
| $E_a / \text{kJ mol}^{-1}$ | 38.4                      | 21.6                              | 43.5                              |
| $\tau_0 / \text{s}$        | $2.37 \times 10^{-16}$    | $3.94 \times 10^{-13}$            | $1.56 \times 10^{-16}$            |

Low-field relaxometry measurements were carried out on a 20 MHz Maran Benchtop NMR spectrometer. Figure S5 shows the low-field relaxation times for [C<sub>2</sub>MIM][OAc] and [C<sub>2</sub>MIM][OOct] as a function of temperature.  $T_1$  and  $T_2$  increase as temperature increases for both ILs. This type of behaviour is predicted by Bloembergen, Purcell, and Pound (BPP) theory <sup>1</sup>. BPP theory can be used to relate the NMR relaxation times to the molecular rotational correlation times in the simplified case of two protons at a fixed distance  $r_{H-H}$  apart, interacting with each other via their dipolar fields as follows,

$$R_1 = \frac{1}{T_1} = 2A \left( \frac{\tau}{1 + \omega^2 \tau^2} + \frac{4\tau}{1 + 4\omega^2 \tau^2} \right)$$
$$R_2 = \frac{1}{T_2} = A \left( 3\tau + \frac{5\tau}{1 + \omega^2 \tau^2} + \frac{2\tau}{1 + 4\omega^2 \tau^2} \right)$$
$$A = \frac{3}{20} \gamma^4 \hbar^2 \left( \frac{\mu_0}{4\pi} \right)^2 r_{H-H}^{-6}$$

where  $\tau$  is the correlation time of the molecular rotation,  $\omega$  is the Larmor frequency,  $\gamma$  is the gyromagnetic ratio for protons,  $\hbar$  is the reduced Planck constant,  $\mu_0$  is the permeability of free space and  $r_{H-H}$  is the inter-proton distance.

The  $T_1$  behaviour indicates that at the 1/(20 MHz) timescale, both ILs are in a ‘liquid-like’ state at the upper end of the temperature range studied. However, the  $T_1$  values for [C<sub>2</sub>MIM][OOct] show a turning point at around 0 °C. This turning point indicates the transition from the ‘liquid-like’ regime to the ‘solid-like’ regime, on the 20 MHz timescale. The dashed lines in Figure S5 show theoretical fits, obtained from BPP theory <sup>1</sup>. The correlation time was modelled using a simple Arrhenius-type equation, as shown below,

$$\ln \tau = \ln \tau_0 + \frac{E_a}{RT}$$

where  $\tau_0$  is the correlation time at “infinite temperature”,  $E_a$  is activation energy for molecular rotation,  $R$  is the molar gas constant and  $T$  is the temperature. Typical values for the correlation times are  $\sim 10^{-9}$  s.

The data for [C<sub>2</sub>MIM][Ac] are modelled reasonably well by classical BPP theory at most temperatures studied and the fitting parameters are given in Table S1. It is noteworthy that the distance between protons,  $r_{\text{H-H}}$ , is close to the expected value based on the density and molar volume of the ILs.

The fits for [C<sub>2</sub>MIM][Ac], shown in Figure S5a, indicate that the dynamics of [C<sub>2</sub>MIM][Ac] are relatively simple at these timescales, with a single correlation time across the system. Conversely, the [C<sub>2</sub>MIM][OOct] data is not described well by classical BPP theory. It was not possible to simultaneously fit both  $T_1$  and  $T_2$  with a single correlation time.

The fits shown in Figure S5b were obtained by separately fitting the  $T_1$  and  $T_2$  datasets, indicating that the two NMR relaxation processes were described by two different correlation times.  $T_2$  is more sensitive than  $T_1$  to slower dynamics. This suggests there is a significant presence of these slower processes in [C<sub>2</sub>MIM][OOct] than in [C<sub>2</sub>MIM][Ac], which could be explained by the more complex dynamics stemming from the formation of larger aggregates, as suggested in the main article.

### Relaxation Data Fitting

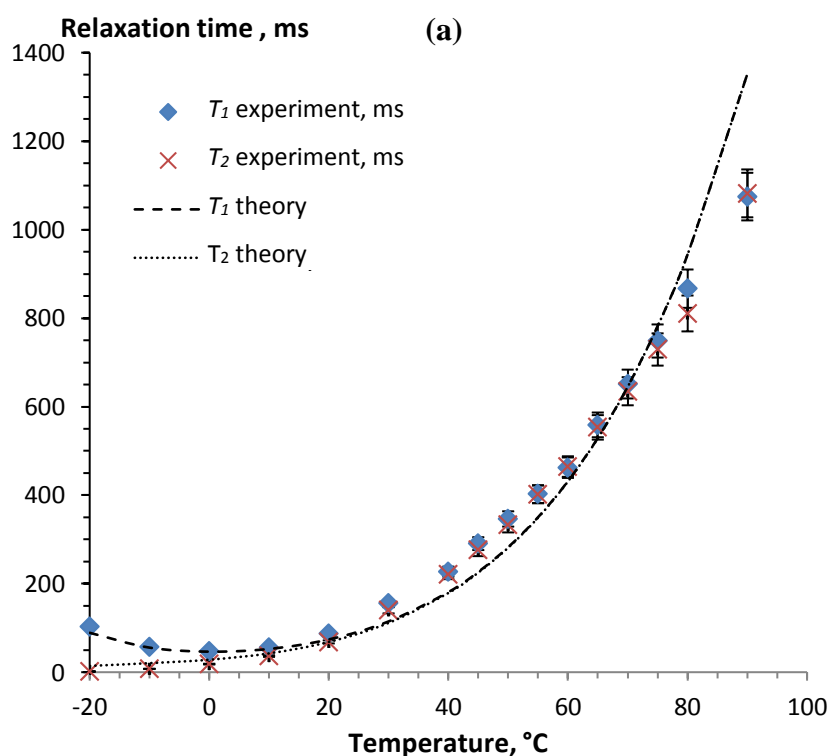

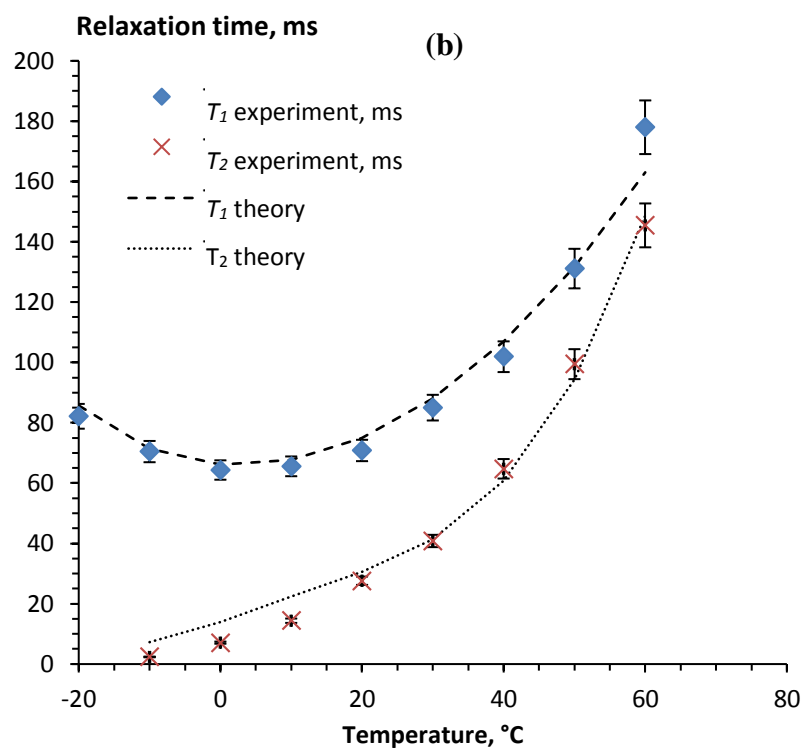

**Figure S5**

$T_1$  and  $T_2$  relaxation times for [C<sub>2</sub>MIM][Ac] (a) and [C<sub>2</sub>MIM][OOct] (b) as a function of temperature, taken on a low-field (20 MHz) NMR spectrometer.



Diffusion coefficients for the ILs were measured using pulsed field gradient (PFG) NMR, as detailed in the main article. Figure S6 shows a plot of signal intensity as a function of gradient field strength for a single resonance in [C<sub>2</sub>MIM][OOct] at 30 °C. Each resonance was fitted in the same way for both ILs and all temperatures. Figure S6 exhibits a very high quality of fit, typical of all the experiments, thus there are no indications of restricted diffusion or the need for more than one self-diffusion coefficient per resonance.

All PFG NMR experiments presented in the main article were undertaken with a diffusion time,  $\Delta$ , of 100 ms. Additional experiments were undertaken, varying  $\Delta$  between 50 ms and 200 ms. The diffusion coefficients found were the same for all  $\Delta$  values used, within experimental error of <5%.

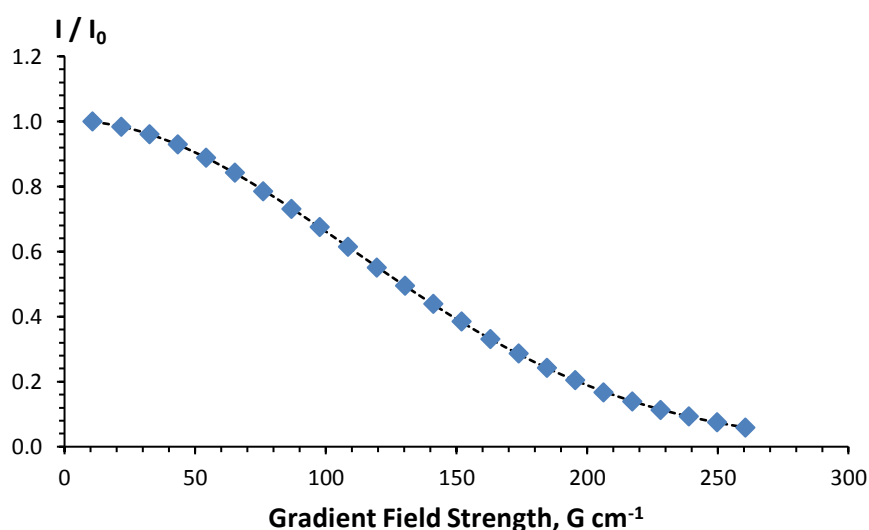

**Figure S6**

Example fit of signal intensity and gradient field strength in a PFG NMR experiment on [C<sub>2</sub>MIM][OOct] at 30 °C. Points show experimental data and dashed line shows a Gaussian fit, based on the Stejskal-Tanner equation <sup>2</sup>.

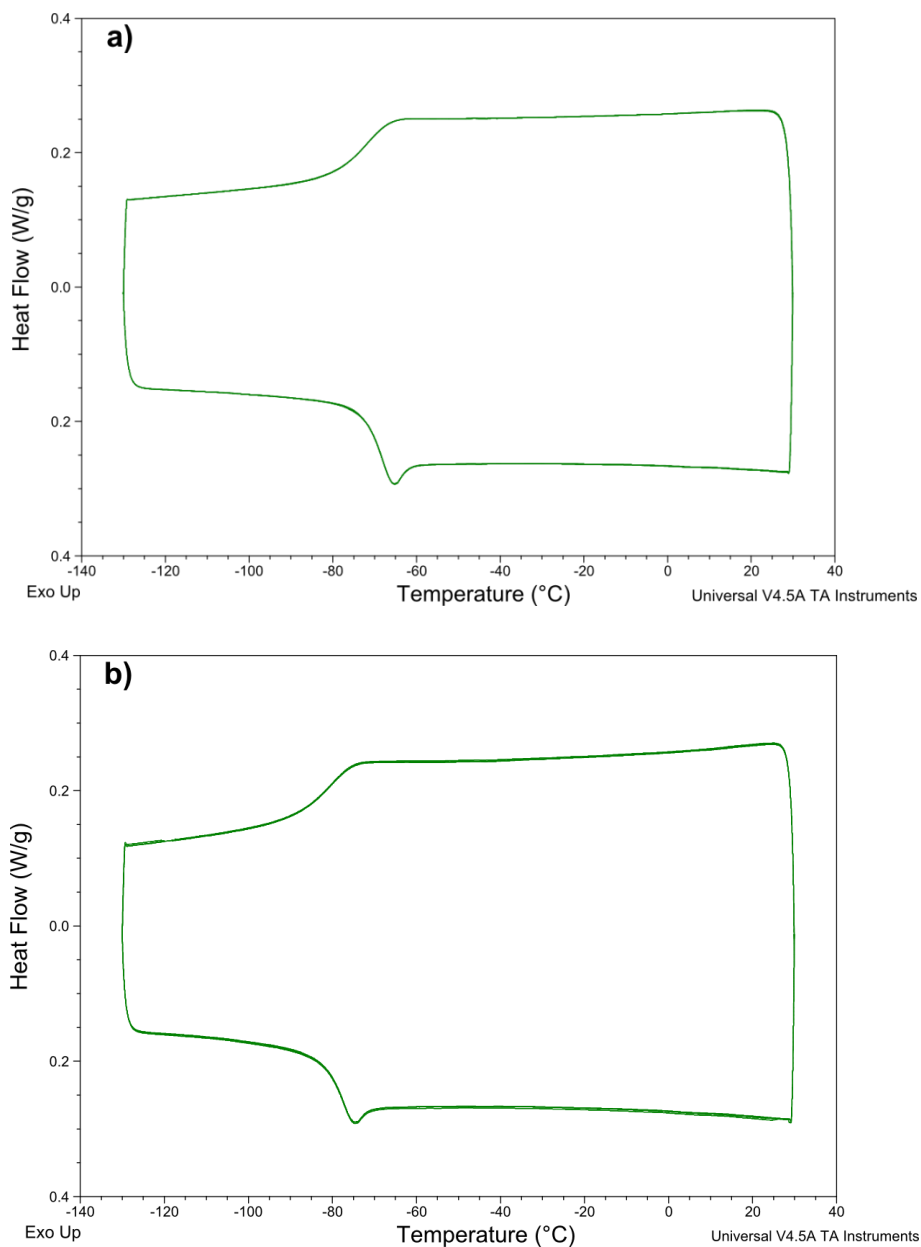

**Figure S7**

DSC traces of **a)** [C<sub>2</sub>MIM][OAc] and **b)** [C<sub>2</sub>MIM][OOct], showing the glass transitions at temperatures below – 60 °C. See main article for further details.

## References

- 1 Bloembergen, N., Purcell, E. M. & Pound, R. V. Relaxation Effects in Nuclear Magnetic Resonance Absorption. *Physical Review* **73**, 679-712, doi:10.1103/Physrev.73.679 (1948).
- 2 Stejskal, E. O. & Tanner, J. E. Spin Diffusion Measurements: Spin Echoes in the Presence of a Time-Dependent Field Gradient. *The Journal of chemical physics* **42**, 288-292, doi:10.1063/1.1695690 (1965).
